# Supplementary material for: Discovery and Characterization of Iron Sulfide and Polyphosphate Bodies Coexisting inArchaeoglobus fulgidusCells
Source: Hindawi journal article supplement (doi:10.1155/2016/4706532), 2016-01-01

Supplementary Figure 1

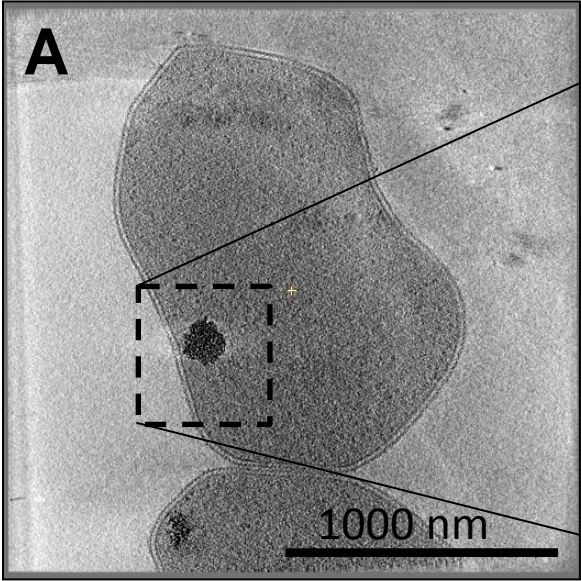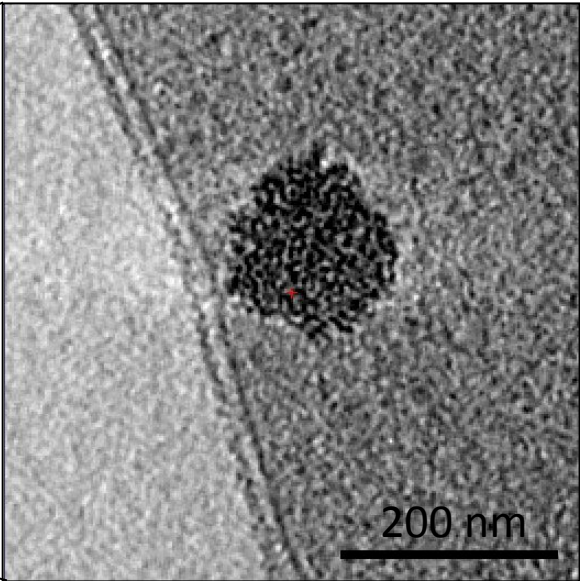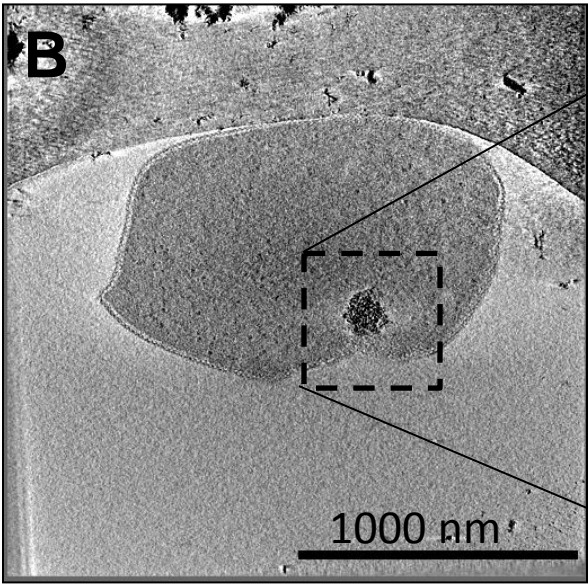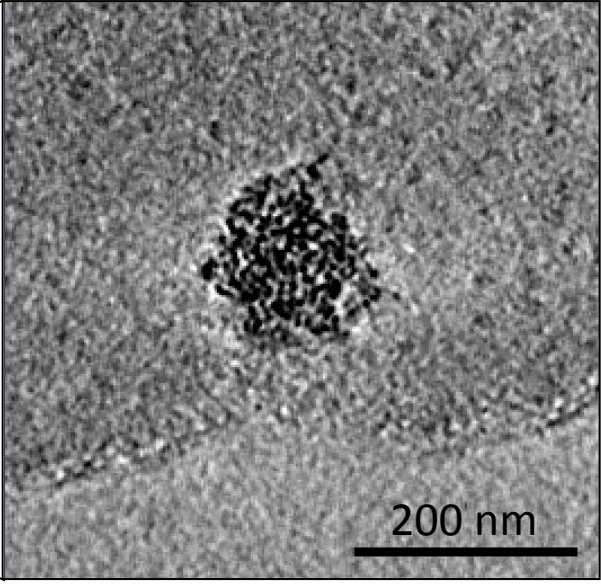

Supplementary Figure 2

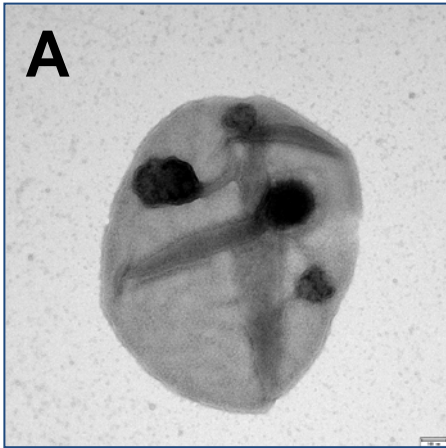

Normal Conditions

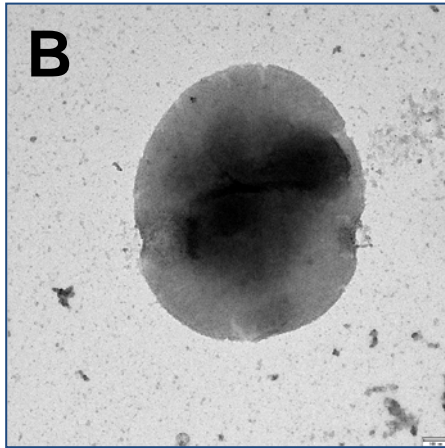

Excess phosphate

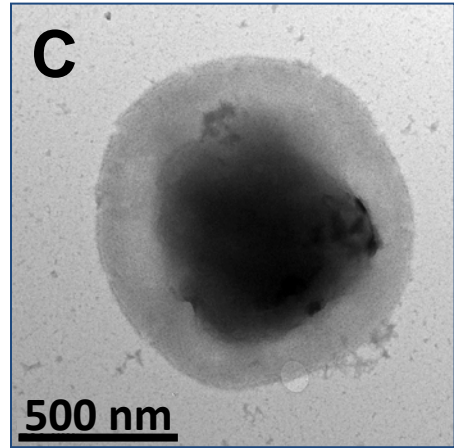

Reduced phosphate

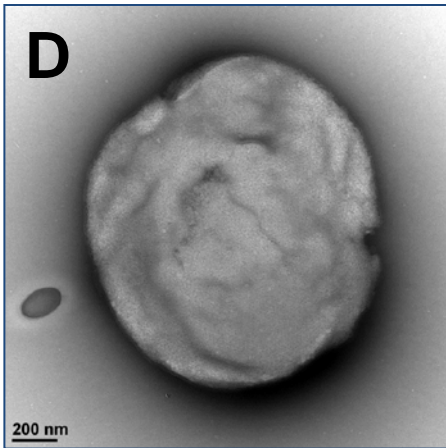

Reduced lactate

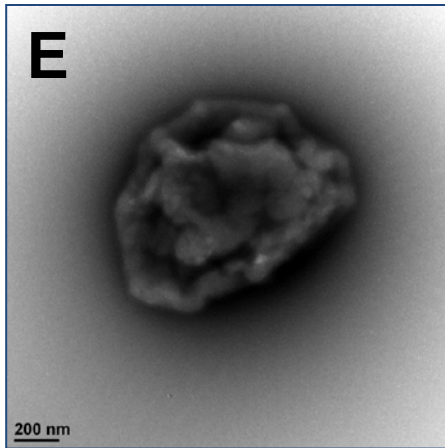

No phosphate

# Supplementary Figure 3

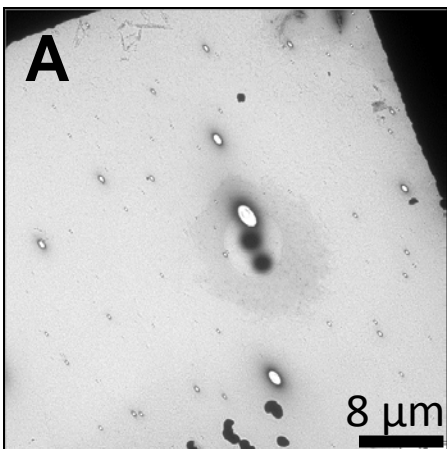

0 mM  $\text{PO}_4$

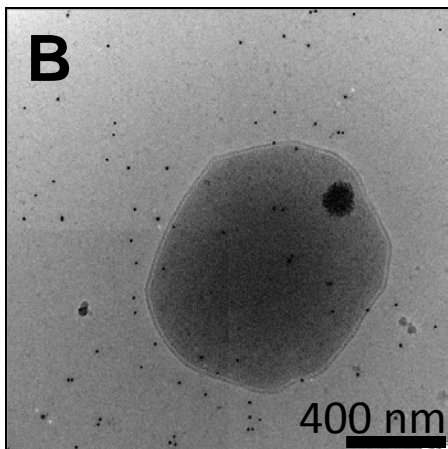

1 mM  $\text{PO}_4$

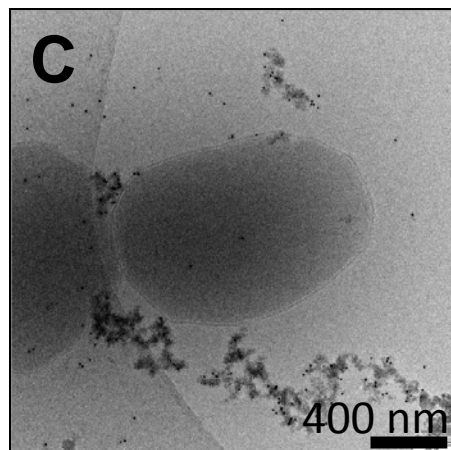

2 mM  $\text{PO}_4$

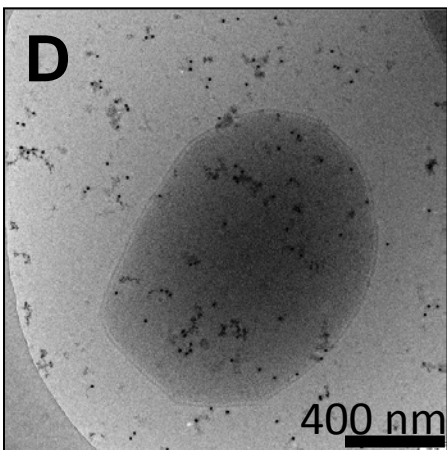

4 mM  $\text{PO}_4$

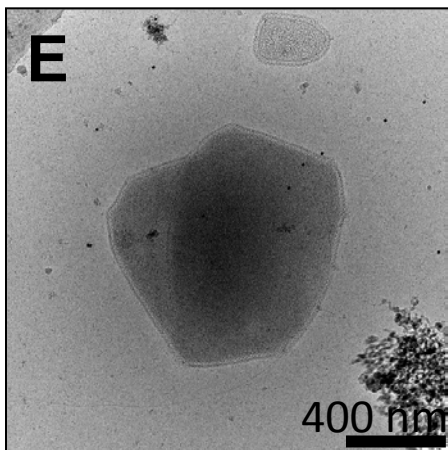

9 mM  $\text{PO}_4$



Supplementary Figure 4

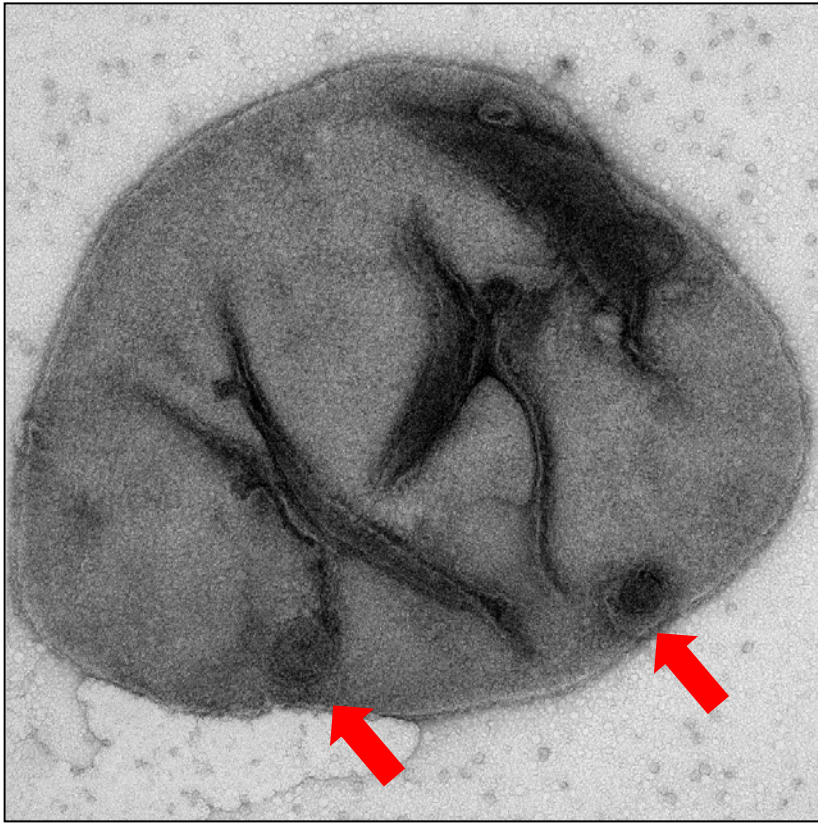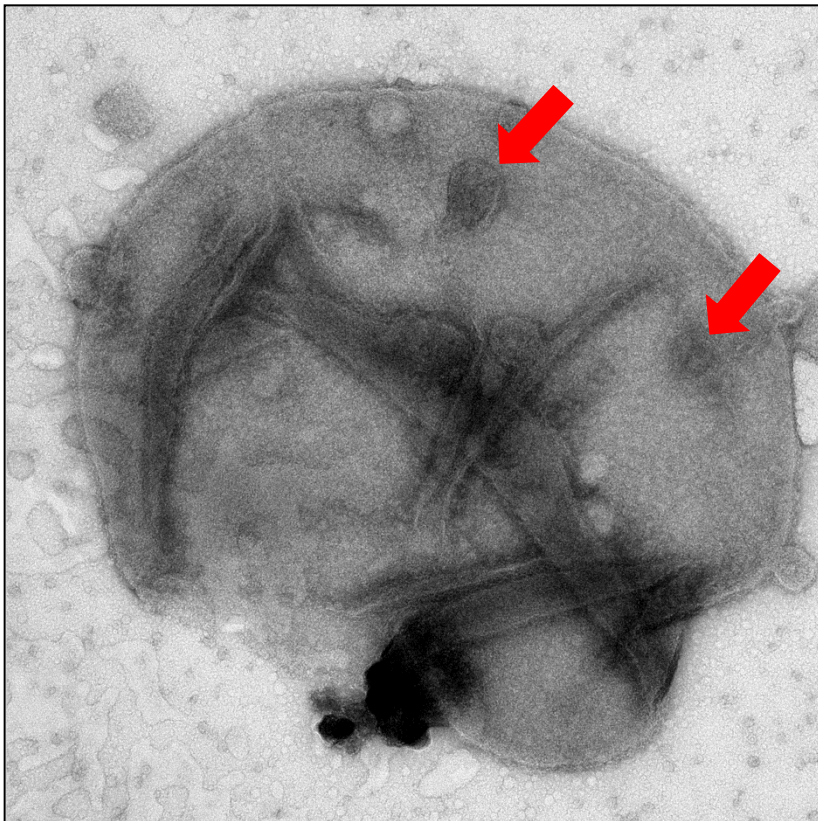

Supplement: f1 [file 4706532.f1.pdf]
